# Supplementary material for: Genome-Wide Analyses of the Soybean F-Box Gene Family in Response to Salt Stress
Source: MDPI journal article supplement (doi:10.3390/ijms18040818), 2017-04-12

|                                                                                               |                                                                                    |    |
|-----------------------------------------------------------------------------------------------|------------------------------------------------------------------------------------|----|
| GmFBX1                                                                                        | -----FSSLPYDVLAKIAASFD--DPNLR-----AASLVCRAWCEA-----                                | 34 |
| GmFBX12.1                                                                                     | -----PSPPGAGDPSALPYDVLAKIAASFD--DPNLR-----AASLVCRAWCEAL-----                       | 43 |
| GmFBX84                                                                                       | -----MQILSLVD--DQTVI-----TASGVCRGWRDA-----                                         | 25 |
| GmFBX122.1                                                                                    | -----WKDIPVELLMQILSLVD--DQTVI-----IASGVCRGWRDA-----                                | 34 |
| GmFBX287.1                                                                                    | -----KDIPVELLMQILSLVD--DQTVI-----IASEVCRGWREAI-----                                | 34 |
| GmFBX330.1                                                                                    | -----KDIPVELLMQILSLVD--DQTVI-----IASEVCRGWREAI-----                                | 34 |
| GmFBX14                                                                                       | -----PRLDDSLSESSKLESPLMDLLVKILCHLH--HDQLR-----AVFHVSRIRKAVIMARQHFHNN-----          | 57 |
| GmFBX368                                                                                      | -----PRLDDSLSES-KLESPLMDLLVKILCHLH--HDQLR-----AVFHVSRIRKAVIARQHFHNYTT-----         | 58 |
| GmFBX155                                                                                      | -----TFDSERSRLEALPLDVLIRVLCGVD--HEDLK-----QLVRVSKTVREAAEAIARR-----                 | 48 |
| GmFBX168                                                                                      | -----DSERSRLEALPLDVLIRVLCGVD--HEDLK-----QLVRVSKTVREAAEVARR-----                    | 46 |
| GmFBX308                                                                                      | -----KRSLLDALPQDVLVQVLCGVD--HEDLK-----QLFHVSKTIREATTVVKKLHFDISTPKKKT-----          | 56 |
| GmFBX5                                                                                        | -----N-VVDLA-----VASLVCKMWNKACH-DPSLWRKID-----                                     | 29 |
| GmFBX16                                                                                       | -----DIIITILMSLN--VVDLA-----VASLVCKMWNKACH-DPSLWRKID-----                          | 39 |
| GmFBX352                                                                                      | -----TEIITIFMSVN--IVDLA-----VASLVCKMWNKACH-DPSLWGRKID-----                         | 40 |
| GmFBX237                                                                                      | -----EILVTILMFLN--VGDIA-----AASMVNKIWNKACH-DPSLWHTLD-----                          | 39 |
| GmFBX508                                                                                      | -----TILSLDPDIVTTTIFAFLD--MFDLV-----RCSLVCKLWNAIVE-SRSLRE-----                     | 43 |
| GmFBX6                                                                                        | -----SQIPPELFHHILKFLS--SEDLV-----SCSLVCRFLNYAAS-DEALWRRLY-----                     | 44 |
| GmFBX271                                                                                      | -----SQIPPELFHHILKFLS--SEDLV-----SCSLVCRFLNYAAS-DEALWRRLY-----                     | 44 |
| GmFBX263                                                                                      | -----LPQDILVLIFSLD--MKSLV-----SVGLVCRSWNIAAN-DNHLW-----                            | 38 |
| GmFBX497                                                                                      | -----QLPQDILAHIFSLE--MKSLV-----SMGLVCWSWNIAAN-DNHLWEKQ-----                        | 42 |
| GmFBX41                                                                                       | -----DILREILKRLD--GPSLG-----VAACVCRLWCSLTISNDDSLWEHLCF-----                        | 41 |
| GmFBX319                                                                                      | -----DILREILKRLD--GPSLG-----VAACVCRLWCSLTRNDDSLWEHLCF-----                         | 41 |
| GmFBX253.1                                                                                    | -----DILRLIFENLP--IPDLA-----RASCVCRLWNSVA-----                                     | 29 |
| GmFBX504                                                                                      | -----DILRLIFENLP--IIDLA-----RASCVCRLWNSVA-----                                     | 29 |
| GmFBX83                                                                                       | -----MLPLEICMKIFCLLD--YQHLA-----VAQVCRKWKLVAS-DNTLWSNL-----                        | 42 |
| GmFBX124                                                                                      | -----ERLPLEICMKIFYLLD--YQHLA-----VAQVCRKWKLVAS-ENALWSDL-----                       | 43 |
| GmFBX27                                                                                       | -----GLPARLLWEVMRRLP--PPGLL-----SAAKVCCKGWRDTAK-RMW-----                           | 37 |
| GmFBX240                                                                                      | -----LPASLMWEVMRRLP--PPGLL-----SAAKVCCKGWRDTAK-R-----                              | 34 |
| GmFBX53                                                                                       | -----SGLPGNLLWEVLRRLP--PAGLL-----SAAKVSRGWREMTIR-S-----                            | 36 |
| GmFBX475                                                                                      | -----SGLPGNLLWEVLRRLP--PAGLL-----TAAMVSRGWREMTIR-S-----                            | 36 |
| GmFBX85.1                                                                                     | -----RSLPDELLFEVFARMT--PYDLG-----RASCVCCKWKYTIR-NPVFWRNACL-----                    | 45 |
| GmFBX121                                                                                      | -----RSLPDELLFEVFARMT--PYDLG-----KASCVCCKWKYTIR-NPVFWRNACL-----                    | 45 |
| GmFBX69                                                                                       | -----DNLLFEVLKHVD--ARTLA-----MAGCVNKQWHKTAQ-DERLWELI-----                          | 39 |
| GmFBX111                                                                                      | -----DNLLFEVLKHVD--ARTLA-----MAGCVNKQWHKTAQ-DERLWELI-----                          | 39 |
| GmFBX325                                                                                      | -----DNVLSEVLRHVD--ARSLA-----MAGCVSKQWQKMAR-DERLWELIC-----                         | 40 |
| GmFBX405                                                                                      | -----DDNVLFEVLRHVD--ARSLA-----MAGCVSKQWQKMAR-DERLWELI-----                         | 40 |
| GmFBX32                                                                                       | -----PWEALILVATYLD--PKTLA-----MASCVSKSWFSSMS-SDIWKPIILATHFPSLSLTPSSAPTVAAYRRL----- | 63 |
| GmFBX327                                                                                      | -----DDLLHMFVSFLD--HPNLC-----KAARICKQWRGASA-HEDFWKSLN-----                         | 40 |
| GmFBX403.1                                                                                    | -----DDLLHMFVSFLD--HPNLC-----KAARVCKQWRGASA-HEDFWKSLN-----                         | 40 |
| GmFBX113                                                                                      | -----DDLLHMFVSFLD--HPNLC-----RAARVCKQWRGASA-HEDFWKSLN-----                         | 40 |
| GmFBX71.1                                                                                     | -----DDLLHMFVSFLD--HPNLC-----KAARVCKQWWTASA-HEVFWKSLN-----                         | 40 |
| GmFBX193.1                                                                                    | -----EEVLKAVFPFLD--SVDLA-----SCMGVCTQWKDIAS-DDFFWKCL-----                          | 39 |
| GmFBX445                                                                                      | -----EEVLKAVFPFLD--GVDLA-----SCMAVDKQWKDIAS-DDFLWKCL-----                          | 39 |
| GmFBX2                                                                                        | -----DILEAIFSHVP--LIHLV-----PASHVSNWKRASVSSL-----                                  | 33 |
| GmFBX11                                                                                       | -----DILEAIFSHVP--LIHLV-----PASHVSNWKRASVSSL-----                                  | 33 |
| GmFBX200                                                                                      | -----DILEAIFSHVP--LIHLV-----PASHVSNWKRASVSTSLR-----                                | 34 |
| GmFBX413                                                                                      | -----DILEAIFSHVP--LIHLV-----SASHVSEWKRAIS-----                                     | 30 |
| GmFBX4                                                                                        | -----ILIEILSHVP--AKDLI-----SLKRVCKEWHHVIS-----                                     | 29 |
| GmFBX198                                                                                      | -----LNSDILIEILSHVP--AKDLI-----SLKLVSKEWHRLISS-----                                | 34 |
| GmFBX63                                                                                       | -----DDILHEILLRIP--PPTIS-----KLIIVSKIWLRVICSPSFRQCYVRQWGQSFRLLGF-----              | 52 |
| GmFBX482                                                                                      | -----DDILHEILLRIP--PPTIS-----KLIIVSKIWLRVICSPSFRQCYLRQWGQSFRLLGF-----              | 52 |
| GmFBX141                                                                                      | -----SINNLSDDVMGEIFIRLP--FRSTV-----KCKCVCKRWGLISSPSFTE-----                        | 44 |
| GmFBX188                                                                                      | -----NINNLLDDVLGEIFIRLP--FRSTN-----TCKCVCKRWGLISS-----                             | 38 |
| GmFBX215                                                                                      | -----TINNLFDDSLTEIFCKLP--CKSLF-----TCKSVSKRWLTLLSNPNFSLF-----                      | 45 |
| GmFBX21                                                                                       | -----RLAEDSLRQIFCRLP--LREIM-----ICRSVSKFFLQLLSTPS-----                             | 37 |
| 1.....10.....20.....30.....40.....50.....60.....70.....80.....90.....100.....110.....120..... |                                                                                    |    |

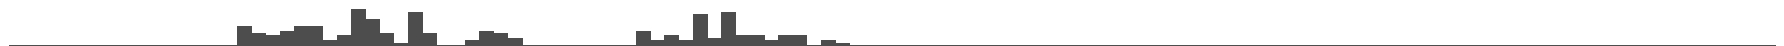

|                                                                                               |                                                                                                           |    |
|-----------------------------------------------------------------------------------------------|-----------------------------------------------------------------------------------------------------------|----|
| GmFBX82                                                                                       | -----SESNNLIPYLPNDVALNCLARIP--RSHHP-----TSLSVSKPIRSLLYSPLLFTTRSLLOCTQPLLVLTLRSRDSSLQWFTLHRTNPNPLAPLP----- | 90 |
| GmFBX125                                                                                      | -----IPSLPDDVALNCLGRIP--RSQHP-----TSLSVSKPIRTLLSSPILF-----                                                | 41 |
| GmFBX52.1                                                                                     | -----IERLPDAVAIRCLARVP--FYFHP-----VLELVSRSWQAAIRSPEL-----                                                 | 40 |
| GmFBX147.1                                                                                    | -----ICGLPDDISLMCLARIP--RKYHS-----VMKCVSKRWRNLICSEEW-----                                                 | 40 |
| GmFBX148                                                                                      | -----ICGLPDDISLMCLARIP--RKYHS-----VLKCVSKRWRDLICS-----                                                    | 37 |
| GmFBX146                                                                                      | -----ICGLPDDISLMCLARVP--RKYHS-----VLKCVSKRWRDLICS-----                                                    | 37 |
| GmFBX144                                                                                      | -----LISGLPEDVARDCLIRVS--YQQFP-----TVASVCKLWKSEIHAFEFRRQRRSTKHAQK-----                                    | 53 |
| GmFBX186                                                                                      | -----ISGLPEDVARDCLIRVS--YQQFP-----TVASVCKLWKSEIHAFEFHR-----                                               | 42 |
| GmFBX318                                                                                      | -----ISGLPEDVARDCLIRIP--YEQFP-----AVASVCKGWNTEIHSPDFHRR-----                                              | 43 |
| GmFBX335                                                                                      | -----ISGLPEDVARDCLIRVP--YDQFP-----AVASVCKGWSAEIHSPDFHR-----                                               | 42 |
| GmFBX277                                                                                      | -----LPGLPDDVAEYCLALVP--RSNFP-----AMGGVCKIWRSFQSK-----                                                    | 38 |
| GmFBX411                                                                                      | -----LPGLPDDVAEYCLALVP--RSNFP-----AMGVVCKGWSRFQSK-----                                                    | 39 |
| GmFBX174.1                                                                                    | -----LPGLPDDVSKHCLALVP--RSNFP-----AMGGVCKRWRGFIRSK-----                                                   | 39 |
| GmFBX284                                                                                      | -----LLPGLIDDVALNCLAWVS--GSDYA-----ALSCINKRFRNKLINSGLYGLRKQLGAVEHLVYMVCDPRGWVAFDPKINRWMSLPKIPCEDEC-----   | 86 |
| GmFBX316.1                                                                                    | -----SLIPGLIDDVALNCLAWVS--GSDYA-----VLSCINKRFRNKLINSGLYGLRKQLGAVEHLVYMVCDPRGWVAFDPKINRWISLPKIPCEDEC-----  | 86 |
| GmFBX54                                                                                       | -----IPGLPNDVAASILSKVP--YSHHG-----RLKATCKSWKLLLSKS-----                                                   | 39 |
| GmFBX476                                                                                      | -----IPGLPNDVAASILSMVP--YSHHG-----RLKATCKSWKLLLS-----                                                     | 36 |
| GmFBX86                                                                                       | -----LPGLPDDLAIACLIRVP--RVEHR-----KLRLVCKRWYRLL-----                                                      | 35 |
| GmFBX453                                                                                      | -----LPGLPDDLAIACLIRVP--RVEHR-----KLRLVCKRWYRLLV-----                                                     | 36 |
| GmFBX99.1                                                                                     | -----LPGLPDDLAIACLIRVP--RVEHS-----KLRLVCKRWYRLLSGNF-----                                                  | 39 |
| GmFBX177                                                                                      | -----LPGLPDDLAIACLIRVP--RVEHG-----KLRLVCKRWYHLLSGNF-----                                                  | 39 |
| GmFBX212                                                                                      | -----LLSGLPDDLAIACLIRVP--RIEHR-----KLHLVCKRWHRLLSDFD-----                                                 | 41 |
| GmFBX350.1                                                                                    | -----LPGLPDDLAVTCLIRVP--RIEHR-----KLHLVCKRWRRLLSDFD-----                                                  | 40 |
| GmFBX303                                                                                      | -----IPGLPDDVALNCLLRLP--VQSHS-----SCRAVCKRWHMLLGNK-----                                                   | 38 |
| GmFBX344                                                                                      | -----IPGLPDDVALNCLLRLP--VQSHS-----SCRAVCKRWHMLLGNK-----                                                   | 38 |
| GmFBX488                                                                                      | -----TISSLPDDIVLDCLSRVP--TSSLP-----ALSLVCCRWSRLLSPPD-----                                                 | 40 |
| GmFBX75                                                                                       | -----IPNLPDELSLQIIARLP--RICYF-----NVLVSKRWKSTIMSSELY-----                                                 | 41 |
| GmFBX120.1                                                                                    | -----IPNLPDELSLQIIARLP--RICYF-----NVLVSKRWKSTIMSSELY-----                                                 | 41 |
| GmFBX290                                                                                      | -----IPNLPDELSLQIIARLP--RICYF-----HVRLVSRWKATITSELY-----                                                  | 41 |
| GmFBX332                                                                                      | -----IPNIPDELSLQIIARLP--RICYF-----HVRLVSRWKATITSELY-----                                                  | 41 |
| GmFBX353                                                                                      | -----IPNLPDDLSLQIIARLP--RICYF-----HVRLVSRWKATIKFNLIYDRLCI-----                                            | 46 |
| GmFBX94.1                                                                                     | -----IPSLPDEISIQILARVP--RIYYL-----NLKLVCRWKEILVSSELF-----                                                 | 41 |
| GmFBX169.1                                                                                    | -----IPSLPDEISIQILARVP--RIYYL-----NLKLVCRWKEIT-----                                                       | 34 |
| GmFBX100                                                                                      | -----DLIPKLPSELGLECLTRLP--HSAHR-----VALRVCSQWHCLLQSDAFYS-----                                             | 44 |
| GmFBX116                                                                                      | -----LIPGLPYEIAELCLLHVP--YPYQA-----LSRSVSSTWNRAITHPSFIYSKKTLSHPLFLVLAHFSQTGKIQWQALDPSSGRWF-----           | 78 |
| GmFBX66.1                                                                                     | -----LPDDILEMCLVRLP--LTSLM-----NARLVCKKWRSLTTTPRF-----                                                    | 37 |
| GmFBX109.1                                                                                    | -----LPDDILEMCLVRLP--LTSLM-----NARLVCKKWRSLTTTPRF-----                                                    | 37 |
| GmFBX70                                                                                       | -----WSKLPPDVVEHILLLLP--LKTLL-----NLRPTCKAFTSLFSPSFVSK-----                                               | 43 |
| GmFBX112                                                                                      | -----WSKLPPDVVEHILLLLP--LKTLL-----NLRPTCKAFTCLFSPSFVSK-----                                               | 43 |
| GmFBX326                                                                                      | -----WSKLPPPEILEYILSFLP--LKTFL-----NLRSTCKGFWSLIFSPPFISKH-----                                            | 44 |
| GmFBX10                                                                                       | -----LPEDLITEILMMLP--VRSIL-----RFKCMCKSWFSLISDPE-----                                                     | 36 |
| GmFBX379                                                                                      | -----LPEDLITEILMMLP--VRSIL-----RFKCMCKLWFSLISDPE-----                                                     | 36 |
| GmFBX377                                                                                      | -----LPEDLITEILMMLP--VRSIL-----RFKYMCKSWFSLISHPE-----                                                     | 36 |
| GmFBX380                                                                                      | -----LPEDLITEILMMLP--VRSIL-----RFKCMCKSWFFLISHPE-----                                                     | 36 |
| GmFBX378                                                                                      | -----DLITEILMMLP--VRSIL-----RFKCMCKLWFSLISHPEFARSHFALAATPT-----                                           | 46 |
| GmFBX19                                                                                       | -----LPQELIIEILLRLP--VKSIV-----RFKCVCRWLWLSLISDPS-----                                                    | 36 |
| GmFBX371                                                                                      | -----LPQELIIEILLRLP--VKSIV-----RFKCVCKLWLSLISDPH-----                                                     | 36 |
| GmFBX123                                                                                      | -----IAILPWELIIEILLRLP--VKSIV-----RFKCVCKSWLCLLSDPH-----                                                  | 39 |
| GmFBX292                                                                                      | -----LPQELIIEILLRLP--VKSLL-----RFKRVCSNWSLIS-----                                                         | 33 |
| GmFBX448.1                                                                                    | -----TLPQELIIEILLRLP--VKSLL-----RFKCVCKSFLSLISDPQF-----                                                   | 38 |
| GmFBX157                                                                                      | -----LPQELIIEILLRLP--VKSLL-----RFKCVSKSWLSLITDPH-----                                                     | 36 |
| GmFBX389                                                                                      | -----VFLPQELIIEILLRLP--VKSLL-----RFKCIS-----                                                              | 27 |
| GmFBX171.1                                                                                    | -----LPQDLITEILLRLP--VKSIV-----RFKSVCKSWLFLISDPR-----                                                     | 36 |
| GmFBX385                                                                                      | -----LPQDLVIQILLRLP--VKSIV-----RFKSVCKSWLSFISDHLWLS-----                                                  | 40 |
| GmFBX382                                                                                      | -----DLPQELIIEILLRLP--VKSLL-----RFKTVCKSWLSHISDPH-----                                                    | 37 |
| 1.....10.....20.....30.....40.....50.....60.....70.....80.....90.....100.....110.....120..... |                                                                                                           |    |

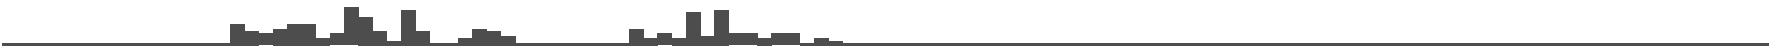

|            |     |                      |         |     |                                              |           |    |
|------------|-----|----------------------|---------|-----|----------------------------------------------|-----------|----|
| GmFBX383   | --- | LPQEMVNQILLRLP       | --VKSLL | --- | QFKIVCKSWLSHISDPH                            | ---       | 36 |
| GmFBX198.1 | --- | LPLELIREVLLRLP       | --VRSVI | --- | RFRVCVCKSWLSLISDPQF                          | ---       | 37 |
| GmFBX245   | --- | LPLELIREILLRLP       | --VRSVI | --- | RFKCVCKSWLSLISDPQ                            | ---       | 36 |
| GmFBX449   | --- | LPLELIIEILMRLP       | --VRSVI | --- | GFKCVCKSWFSLISDPQ                            | ---       | 36 |
| GmFBX152   | --- | SLPLELIEEILLRLP      | --VRSIL | --- | RFKCVCKSWFSLISEP                             | ---       | 36 |
| GmFBX45.1  | --- | PGELIGAILLWLP        | --VRSVI | --- | RFKCVCKSWLSVISDPH                            | ---       | 35 |
| GmFBX447.1 | --- | LPDLIELILLRLP        | --VKSVI | --- | RFKCVCKSWLSLISDPQF                           | ---       | 37 |
| GmFBX194   | --- | LPMDLMREILLRLP       | --VRSVS | --- | RFKCVCKSWLSIISDPQ                            | ---       | 36 |
| GmFBX446.1 | --- | LPMDLMREILLRLP       | --VRSVS | --- | RCKCVCKSWNFIIISNP                            | ---       | 35 |
| GmFBX246   | --- | LPDELIVEILLRLP       | --VRTLI | --- | RFKCVRKSWLFLISDPQF                           | ---       | 37 |
| GmFBX397   | --- | LPDDQIVEILLRLP       | --VRTLI | --- | RFKCVRKSWLFLISDPQF                           | TKSHFDLAA | 46 |
| GmFBX489   | --- | LPFDLIVEILLRLS       | --VRSLL | --- | RFKCVSKSWCALISDPE                            | ---       | 36 |
| GmFBX108   | --- | PMLPDDLIVNLSRLR      | --VRSLL | --- | RFKCVCKSWLSLISDPQFVK                         | ---       | 41 |
| GmFBX193   | --- | SHDLIVEILLRLP        | --IKSLI | --- | RFKCVCKSWLSFISDPHFVK                         | ---       | 38 |
| GmFBX130   | --- | LPDELMEEILLRLP       | --VRCLV | --- | RFKCVCKSWLSLISDPQ                            | ---       | 36 |
| GmFBX131   | --- | IPDDMMEEILLRLP       | --VKCLI | --- | RFKYVCKSWLSLISDPH                            | ---       | 36 |
| GmFBX154   | --- | DDLITIEILLRLP        | --VRCLL | --- | RFKCVCKSWFSLISNP                             | ---       | 34 |
| GmFBX192   | --- | LPRDLIREILLRLP       | --VKSVI | --- | KCKRVCKTWLSLISDPKF                           | ---       | 37 |
| GmFBX195   | --- | LPPELIREILLSLP       | --VNSLL | --- | QCKRVCKAWLSLISDPQFF                          | ---       | 38 |
| GmFBX132   | --- | LPEELIQVILLRLP       | --LRNLI | --- | HLKRVCKSWLSLISDPQ                            | ---       | 36 |
| GmFBX31    | --- | EELISNILHRVP         | --VRSLL | --- | QFKCVCKSWNSLISDPL                            | ---       | 34 |
| GmFBX260   | --- | PLWLLPEELISEILFRVP   | --VRSLL | --- | QFRVCVCKSWKTLISHP                            | ---       | 39 |
| GmFBX261   | --- | AVLPYDLIWEILLRVP     | --VRSLL | --- | LFKCVCKSWKTLISDPQ                            | ---       | 38 |
| GmFBX300.1 | --- | PFLPDELVEILSRP       | --VKSLL | --- | QFRVCVCKSWMSLISDPYFMKK                       | ---       | 42 |
| GmFBX347   | --- | PFLPDELVEILSRP       | --VKSLL | --- | QFRVCVCKSWMSLIYDPYFMKK                       | ---       | 42 |
| GmFBX348   | --- | LPIELIQEILQRLP       | --VKFLL | --- | QLRCVCKSWKSLISHPQ                            | ---       | 36 |
| GmFBX417   | --- | EKKPWSLLCNEIIEILSHLP | --VKPLI | --- | QFKCVRKEWNSLMSEPYFIKLHLCKSA                  | ---       | 54 |
| GmFBX429   | --- | SLLCNKIIEILSRFP      | --VKPLI | --- | QFKCVCKEWNLSLMSEPY                           | ---       | 38 |
| GmFBX331   | --- | WLSLLCNEIIEILSRP     | --VKPLI | --- | QFMCVCKEWNLSLMSEP                            | ---       | 39 |
| GmFBX427   | --- | SLLCNEIIEILSRP       | --VKPLI | --- | PFKCVCKGWNLSLMSEPY                           | ---       | 38 |
| GmFBX422   | --- | LCNEIIEILSRP         | --VKPLI | --- | QFKCVCKEWNLSLISEPYF                          | ---       | 37 |
| GmFBX425   | --- | SLLCNEIIEILSRP       | --VKPLI | --- | QFKCMCKEWNLSLISEPYF                          | ---       | 39 |
| GmFBX439   | --- | SLLCNEIIEILSRP       | --VKPLI | --- | KFKCVCKEWNLSLISEPYF                          | ---       | 39 |
| GmFBX437   | --- | EILSRP               | --MKPLI | --- | QFKCVCKEWNLSLISEPYF                          | ---       | 30 |
| GmFBX414   | --- | LCDELIKEILSRP        | --VKPLI | --- | QFKCVCKGWNLSLMSDPYF                          | ---       | 37 |
| GmFBX423   | --- | LCDELIKEILSRP        | --VKPLI | --- | QFKCVCKGWNLSLMSDPYF                          | ---       | 37 |
| GmFBX507   | --- | LFDELIKEILSRP        | --VKPLI | --- | QFKCVCKGWNLSLMSDPYF                          | ---       | 37 |
| GmFBX418   | --- | DELIKEILSCLP         | --VKTLI | --- | QFKCVYKGWNLSLMSDPY                           | ---       | 34 |
| GmFBX436   | --- | DELIKEILSRP          | --VKTLI | --- | QFKCVYKGWNLSLMSDPY                           | ---       | 34 |
| GmFBX424   | --- | LCDELIKEILSRP        | --VKPLI | --- | QFKCVYKGWNLSLMSDPY                           | ---       | 36 |
| GmFBX416   | --- | LCDELIEEILSRP        | --VKPLI | --- | QFKCVCKGWNLSLMSDPY                           | ---       | 36 |
| GmFBX420   | --- | DELIEEILSRP          | --VKPLI | --- | QFKCVCKGWNLSLMSDPY                           | ---       | 34 |
| GmFBX438   | --- | LCDELIEEILSRP        | --VKPLI | --- | QFKCVCKGWNLSLMSDPY                           | ---       | 36 |
| GmFBX435   | --- | LCDELIEKILSRP        | --VKPLI | --- | QFKCVCKGWNLSLMSDPY                           | ---       | 36 |
| GmFBX506   | --- | LCDELIEQILSRP        | --VKPLI | --- | QFKCVCKGWNLSLMSDPY                           | ---       | 36 |
| GmFBX421   | --- | LCDELFEIEILSRP       | --VKPLI | --- | QFKCVCKGWNLSLMSDPY                           | ---       | 36 |
| GmFBX430   | --- | LCDELIEEILSRIL       | --VKPLI | --- | QFKCVCKGWNLSLMSDPY                           | ---       | 36 |
| GmFBX441   | --- | LCEELIEEILSRP        | --VKPLI | --- | QFKCVCKGWNLSLMSDPY                           | ---       | 36 |
| GmFBX419   | --- | LCDKLIEEILSRP        | --VKPFI | --- | QFKCVCKGWNLSLMSDPY                           | ---       | 36 |
| GmFBX428   | --- | LCDELIEEILSRP        | --VKPFI | --- | QFKCVCKGWNLSLMSDPYF                          | ---       | 37 |
| GmFBX415   | --- | MEILSRP              | --VKPLI | --- | QFKCVYKGWNLSLMLDPYFIKLHLNKSA                 | ---       | 40 |
| GmFBX440   | --- | MEILSRP              | --VKPLI | --- | QFKYVCKGWNLSLMSDPY                           | ---       | 30 |
| GmFBX426   | --- | LCDELFEIEILSRP       | --VKPLM | --- | QFKCVCKGWNLSLISDPYF                          | ---       | 37 |
| GmFBX451   | --- | MNTYIPRELTEKILIKLP   | --VKSLL | --- | SFKCVRKEWNNLISDPEFAERHFKYQRAETLMIITPDVNHFKSI | ---       | 68 |
| GmFBX505   | --- | MNTYIPRELTEKILIKLP   | --VKSLL | --- | SFKCVRKEWNNLISDPEFAERHFKYQRAETLMIITPDVNHFKSI | ---       | 68 |

1.....10.....20.....30.....40.....50.....60.....70.....80.....90.....100.....110.....120.....

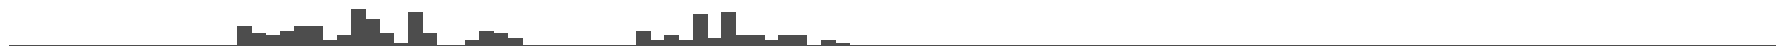

|                                                                                               |                                                                                                           |    |
|-----------------------------------------------------------------------------------------------|-----------------------------------------------------------------------------------------------------------|----|
| GmFBX213                                                                                      | -----PDEVVIQILARLP--VKSLEF-----RFTVCKLWYRLSLD-----                                                        | 33 |
| GmFBX339                                                                                      | -----LPYDVIINILKRLP--VKSLEI-----RFKCVSKDWFNL-----                                                         | 31 |
| GmFBX364                                                                                      | -----HLPQELVSNILSRLP--AKDLV-----KCKRVCKSWFDLIT-----                                                       | 34 |
| GmFBX468                                                                                      | -----HLPQELVSNILSRLP--AIDLVS-----KCKSVCKSWFDLITDSHFV-----                                                 | 39 |
| GmFBX365                                                                                      | -----MSMEHLPGELVSNVLSRLP--SKVLL-----LCKCVCKSWFDLITDPHFV-----                                              | 43 |
| GmFBX467                                                                                      | -----MSMEHLPRELVSNVLSRLP--AKVLL-----LCKCVCKSWFDLITDPHFV-----                                              | 43 |
| GmFBX13                                                                                       | -----LPEDLIVEILSWVE--VKNLML-----RFRVCVSKSWNSLIF-----                                                      | 33 |
| GmFBX101                                                                                      | -----LSEDLIVEILTWVP--VKSLEL-----RFRVCVSKSWNSLIFH-----                                                     | 34 |
| GmFBX89                                                                                       | -----SLLPEELIVEILSWVP--VKALM-----QFRCISKTWNSLILHPT-----                                                   | 38 |
| GmFBX91                                                                                       | -----SLLPEELIVEILSWVP--VKALM-----QFRCVSKTWNSLILHPT-----                                                   | 38 |
| GmFBX209                                                                                      | -----SLLPEELIAEILSWVP--VKALM-----QFRCVSKTWNSLILHPT-----                                                   | 38 |
| GmFBX179                                                                                      | -----LPEELIVEILSWVP--VKPLM-----RFKCVSKTWNSLIFH-----                                                       | 34 |
| GmFBX484                                                                                      | -----SILPQDQIVEILSWVP--VKVLM-----RFRVCVSKTWNSLILNPT-----                                                  | 38 |
| GmFBX191                                                                                      | -----LPRELIVEILSWLP--VKALM-----RFRVYVSETWNSLIFDPT-----                                                    | 36 |
| GmFBX129                                                                                      | -----DEVVVEILSWVP--VKALM-----RFRVCVSKSWNSLILDPTF-----                                                     | 35 |
| GmFBX88                                                                                       | -----PIELIVEILSWLP--VKPLI-----RFRVCVSKTWKSLISH-----                                                       | 33 |
| GmFBX90                                                                                       | -----PIELIVEILSWLP--VKPLI-----RFRVCVSKTWKSLISH-----                                                       | 33 |
| GmFBX208                                                                                      | -----PIELIVEILSWLP--VKPLI-----RFRVCVSKTWKSL-----                                                          | 30 |
| GmFBX199                                                                                      | -----LPQELIVEILSWLP--VKPLM-----RFRVCVSKAWYSLIFHPS-----                                                    | 36 |
| GmFBX394                                                                                      | -----EDLSVEILSWLP--VKVLI-----RFKCVSKTWNSLIFHPML-----                                                      | 35 |
| GmFBX293                                                                                      | -----KILSWLP--VKALL-----RFRVCVCKSWKSLMLDLFSFV-----                                                        | 31 |
| GmFBX390                                                                                      | -----LPGDLIVEILSWLP--VDALL-----RFRVCVCKSWKSLIFDPSF-----                                                   | 37 |
| GmFBX205                                                                                      | -----SYVPDDLIVEILSRLP--VKDLM-----RFRVCVCKTWKSLIFDPSFVKK-----                                              | 42 |
| GmFBX455                                                                                      | -----AQLPQDLIEEILSWLP--VKSLEL-----RFRVCVSRTWNSL-----                                                      | 33 |
| GmFBX458                                                                                      | -----AQLPQDLIEEILSWLP--VKSLEL-----RFRVCVSRTWNSL-----                                                      | 33 |
| GmFBX460                                                                                      | -----AQLPQDLIEEILSWLP--VKSLEL-----RFRVCVSRTWNSL-----                                                      | 33 |
| GmFBX461                                                                                      | -----AQLPQDLIEEILSWLP--VKSLEL-----RFRVCVSRTWNSL-----                                                      | 33 |
| GmFBX462                                                                                      | -----AQLPQDLIEEILSWLP--VKSLEL-----RFRVCVSRTWNSL-----                                                      | 33 |
| GmFBX456                                                                                      | -----AQLPQDLIEEILAWLP--VKSLEL-----RFRVCVSRTWNSL-----                                                      | 33 |
| GmFBX457                                                                                      | -----AQLPQDLIEEILAWLP--VKSLEL-----RFRVCVSRTWNSL-----                                                      | 33 |
| GmFBX464                                                                                      | -----AQLPQDLIEEILSWLP--VKSLEL-----RFRVCVSRTWNSL-----                                                      | 33 |
| GmFBX459                                                                                      | -----AQLPQDLIEEILSWLP--VKSFM-----RFRVCISRTWNSL-----                                                       | 33 |
| GmFBX463                                                                                      | -----LPRELLVEILSWLP--VKSLL-----RRCVCFKAWNSF-----                                                          | 31 |
| GmFBX153                                                                                      | -----KFHVMEILFEKLMMEVLSWLP--VKSLEL-----RFTCASKWFQSLISDSSFVKLHLQRSPKSEDFLLICSVDDTLNRRFFILSCPAIPLVSDDD----- | 85 |
| GmFBX490.1                                                                                    | -----ILPEELLVEILSWVP--VKDLL-----RFRCAKWLRLALISDPTFV-----                                                  | 39 |
| GmFBX162.1                                                                                    | -----ANLPVEVVTEILSRLP--VKSLEI-----RLRSTCKWWSRIIDSRHFV-----                                                | 40 |
| GmFBX381.1                                                                                    | -----MANLPVEVVTEILSRLP--VKSLEI-----RLRSTCKWWSRIIDSRH-----                                                 | 39 |
| GmFBX211.1                                                                                    | -----HLPREVVTDLILSRLP--AKSLI-----RFRSTSKSWKSLIDSQHF-----                                                  | 38 |
| GmFBX349.1                                                                                    | -----HLPREVLTEILSRLP--VRSLL-----RFRSTSKSWKSLIDSQHLNW-----                                                 | 40 |
| GmFBX26.1                                                                                     | -----NLPDEIMLFKILPLLP--SKTLI-----RFRVCCKLWDCFIRDPSFLHLRKLTTNNPTHHFLF-----                                 | 55 |
| GmFBX294                                                                                      | -----WLP--EKTLL-----RLRCVCKFWKTLVFDPI-----                                                                | 25 |
| GmFBX258                                                                                      | -----PDEILVEILHRLP--SKSIL-----RCSAVCKSWRSLISN-----                                                        | 33 |
| GmFBX499                                                                                      | -----PDEILVEIFRRLP--SKSIV-----RCSAVCKLWRSLVTN-----                                                        | 33 |
| GmFBX370                                                                                      | -----DEILGEILHRLP--AKTLL-----KCTTVCKSWKSLITHPSFISTI-----                                                  | 39 |
| GmFBX412                                                                                      | -----NHIPYDLTFILSKLP--SKSLK-----KFGCVHKLWTLVFNQNLVFSMF-----                                               | 43 |
| GmFBX43                                                                                       | -----LSHDELEIFSRLP--AKAIY-----RFTSTSKSFSKLPKETYFASKQTQNSLLRDDTCFFIQPYITQSYNVHVEF-----                     | 69 |
| GmFBX342                                                                                      | -----PDELLLFKICSYLP--AKAIY-----RFKCTCKTVSNIVEETEFAFKQTENS-----                                            | 45 |
| GmFBX79                                                                                       | -----LLPQELIQNIFLSLV--LPEII-----RLKLVNKSFSRIISDHAF-----                                                   | 38 |
| GmFBX133                                                                                      | -----RNSTTKNAVGLCLLPQELIQNIFLSLV--LPEII-----RLKLLNKSFSRIISDNTFVRQYNLSLSSTTWLFVYKKR-----                   | 70 |
| GmFBX486                                                                                      | -----SVVLPLELITEIFLRLP--LKSLEI-----RFRVCVCK-----                                                          | 28 |
| GmFBX65                                                                                       | -----LDVLPDDLLEILAYLP--IASIF-----RAGCVSKRWHEIVNSERFV-----                                                 | 41 |
| GmFBX483                                                                                      | -----LDVLPDDLLEILAYLP--IASIF-----RAGCVSKRWHEIVNSERFV-----                                                 | 41 |
| GmFBX95                                                                                       | -----WSKLPQRLLDRIAFLP--PPAFF-----RARCVCKRWYAL-----                                                        | 34 |
| GmFBX170                                                                                      | -----WSKLPQRLLDRIAFLP--PPAFF-----RARCVCKRWYAL-----                                                        | 34 |
| GmFBX72                                                                                       | -----FSLDDLNEDLFERILSWLP--TSTFF-----RLNSVCKRWKSVAAASA-----                                                | 40 |
| 1.....10.....20.....30.....40.....50.....60.....70.....80.....90.....100.....110.....120..... |                                                                                                           |    |



|                                                                                               |                                                                                                                                                                                                                              |    |
|-----------------------------------------------------------------------------------------------|------------------------------------------------------------------------------------------------------------------------------------------------------------------------------------------------------------------------------|----|
| GmFBX114                                                                                      | -----FSLDDLNE <sup>1</sup> DLFERILSWLQ--TSTFF-----RLNSVCKRWKSVAAASA-----                                                                                                                                                     | 40 |
| GmFBX328                                                                                      | -----FSLDDLNE <sup>1</sup> DLLE <sup>2</sup> RVLSWL <sup>3</sup> P--TSSFF-----RLTSVCKRWKSAAASVSFK--                                                                                                                          | 43 |
| GmFBX402                                                                                      | -----FSLDDLNE <sup>1</sup> DLLE <sup>2</sup> RVLSWL <sup>3</sup> P--TSSFF-----RLTSVCKRWKSAAASVSFK--                                                                                                                          | 43 |
| GmFBX98.1                                                                                     | -----WKNL <sup>4</sup> PEDLFE <sup>5</sup> PVIARLP--IATFF-----RFRSVCQRWNSLLSSQS--                                                                                                                                            | 39 |
| GmFBX176.1                                                                                    | -----WKKL <sup>4</sup> PEDLFE <sup>5</sup> PVIARLP--IATFF-----CFRSVCQRWNSLLTSQS--                                                                                                                                            | 39 |
| GmFBX278.1                                                                                    | -----WKDF <sup>4</sup> PEDLFE <sup>5</sup> AVIARLP--ISTFF-----RFRSVCQRWNSMLNSQS--                                                                                                                                            | 39 |
| GmFBX410.1                                                                                    | -----WKDF <sup>4</sup> PEDLFE <sup>5</sup> AVIARLP--IATFF-----RFRSVCQRWNSMLTSQS <sup>6</sup> F--                                                                                                                             | 40 |
| GmFBX197                                                                                      | -----WAML <sup>4</sup> PEDLLHEILARV <sup>7</sup> P--PFLIF-----RLRLVCKRWNSLLQDSSFLK--                                                                                                                                         | 42 |
| GmFBX450.1                                                                                    | -----WAML <sup>4</sup> PEDLLHEILARV <sup>7</sup> P--PFLIF-----RLRLVCKRWNSLLQDSSFLK--                                                                                                                                         | 42 |
| GmFBX299                                                                                      | -----LPEDLMIEILARVR--VSN <sup>8</sup> PI-----QLRCVCKRWKSLVLD <sup>9</sup> QFVKK--                                                                                                                                            | 40 |
| GmFBX81.1                                                                                     | -----NL <sup>10</sup> SMLNEDLLQNILARLP--ALHFA-----SAACVSKSWNSLCNRIL <sup>11</sup> TR--                                                                                                                                       | 42 |
| GmFBX127                                                                                      | -----SL <sup>12</sup> SMLNEDLLQNILARLP--SLHFA-----SAACVSKSWNSLCRIL <sup>13</sup> SR <sup>14</sup> P--                                                                                                                        | 43 |
| GmFBX242.1                                                                                    | -----TWSDL <sup>15</sup> PELLELILSRLS--LDDNV-----RASVVCKRWHSVATS--                                                                                                                                                           | 38 |
| GmFBX296                                                                                      | -----TWSDL <sup>15</sup> PELLELILSRLS--LDDNV-----RASVVCKRWHSVATS--                                                                                                                                                           | 38 |
| GmFBX56.1                                                                                     | -----WADL <sup>16</sup> PAELLESILSR <sup>17</sup> LI--LVDNI-----RASSVCKRWHSVAS--                                                                                                                                             | 36 |
| GmFBX210.1                                                                                    | -----ITNLSTDLIELILSL <sup>18</sup> LP--IPTLI-----RASTVCKLWHSIISSSS--                                                                                                                                                         | 39 |
| GmFBX442                                                                                      | -----ITNLSTDLIELILSL <sup>18</sup> LP--IPILI-----RASTVCKLWHSIISSSS--                                                                                                                                                         | 39 |
| GmFBX172                                                                                      | -----DLP <sup>19</sup> MNVIVSILQRLP--FQDLV-----KTSVLARAWRYMWS--                                                                                                                                                              | 34 |
| GmFBX354.1                                                                                    | -----DYL <sup>20</sup> PAVLVQLIYRLP--PTTLV-----KCTSVCKAWNKIIRSHD--                                                                                                                                                           | 38 |
| GmFBX51.1                                                                                     | -----KRASNHN <sup>21</sup> SLSW <sup>22</sup> PLPPDLTIKVFSMLD--TQSLC-----YASATCLLFSKCAKD <sup>23</sup> PMCYANLDLTT--                                                                                                         | 57 |
| GmFBX474                                                                                      | -----RASNHN <sup>21</sup> SLSW <sup>22</sup> PLPPDLTIKVFSMLD--TQSLC-----YASAACSLFSKCAKD <sup>23</sup> PMCYANLDLTT--                                                                                                          | 56 |
| GmFBX104                                                                                      | -----TGSSMMEELVPEIT <sup>24</sup> THALSYLD--YPSLC-----RLSMTNSLMRKAANDDN <sup>25</sup> AWKALYHKDF <sup>26</sup> TLEQDSV <sup>27</sup> TP <sup>28</sup> TNGWKAYYAATR--                                                         | 75 |
| GmFBX164.1                                                                                    | -----RMGSSMMEELVPEIT <sup>24</sup> THALSYLD--YPSLC-----RLSMTNSLMRKAANDDN <sup>25</sup> AWKALYHKDF <sup>26</sup> TLEQDSI <sup>29</sup> TP <sup>30</sup> TNGWKAYYAATR--                                                        | 76 |
| GmFBX77                                                                                       | -----WELSD <sup>31</sup> DILT <sup>32</sup> KILASLG--PMDLT-----RVSATCHHLRSLAASVMPYT--                                                                                                                                        | 41 |
| GmFBX274                                                                                      | -----WELSD <sup>31</sup> DILT <sup>32</sup> KILASLG--PMDLT-----RVSATCHHLRSLAASVMPYT--                                                                                                                                        | 41 |
| GmFBX28.1                                                                                     | -----VESITSLSSDLFYDILRRLD--GPTLA-----SAACTCAS <sup>33</sup> FS <sup>34</sup> SSISKEESLWENV <sup>35</sup> CSSV <sup>36</sup> W <sup>37</sup> PS <sup>38</sup> TNRED <sup>39</sup> VKSLISSIGGYRKF--                            | 73 |
| GmFBX239                                                                                      | -----SIASLNSDLLYDILRRLD--GPTLA-----SAACTCAS <sup>33</sup> FS <sup>34</sup> SSISKEESLWENV--                                                                                                                                   | 45 |
| GmFBX50                                                                                       | -----PVD <sup>40</sup> GIPSLNSDLFYDIFRRLD--GATLA-----SAACTCAALCSISKEESLWENV <sup>35</sup> CSSM <sup>41</sup> W <sup>42</sup> PS <sup>43</sup> TNRED <sup>39</sup> VKSLISSVGGFRKF--                                           | 74 |
| GmFBX473                                                                                      | -----PVD <sup>40</sup> SIPSLNSDLFYDIFRRLD--GATLA-----SAACTCAALCSISKEENLWENV <sup>35</sup> CSSM <sup>41</sup> W <sup>42</sup> PS <sup>43</sup> TNRED <sup>39</sup> VKSLISSIGGFRKF--                                           | 74 |
| GmFBX57                                                                                       | -----PDIIQ <sup>44</sup> THILTC <sup>45</sup> LD--GRALA-----SVASTCSQLHALSDHE <sup>46</sup> PLWENIC--                                                                                                                         | 41 |
| GmFBX478                                                                                      | -----PDIIQ <sup>44</sup> THILTC <sup>45</sup> LD--GPSLA-----SVASTCSQLHALSARE <sup>47</sup> PLWENIC--                                                                                                                         | 41 |
| GmFBX243                                                                                      | -----PDIIQ <sup>44</sup> THILTR <sup>48</sup> LP--GPALA-----SATATCSQLHSLSSH <sup>49</sup> DPLWLNACHAT <sup>50</sup> W <sup>51</sup> PS <sup>52</sup> ILTPRV <sup>53</sup> RHV <sup>54</sup> IDTFPN--                         | 62 |
| GmFBX285                                                                                      | -----QSHILNRLD--GPTLA-----SAASATSHLRGLCTE <sup>55</sup> HHLWRNICAATWPS--                                                                                                                                                     | 43 |
| GmFBX315                                                                                      | -----ILNRLD--GPTLA-----SAAS <sup>56</sup> STSHLRR <sup>57</sup> LCTE <sup>55</sup> HHLWRNISAATW <sup>58</sup> PSLNDP--                                                                                                       | 44 |
| GmFBX275                                                                                      | -----ESTSSLATL <sup>59</sup> HS <sup>60</sup> DI <sup>61</sup> IHAHILTRLD--GATLA-----SAASVSSL <sup>62</sup> MHRLCTQDDL <sup>63</sup> WREI <sup>64</sup> STATW <sup>65</sup> PSLQNP <sup>66</sup> IA <sup>67</sup> RHVISAIP-- | 71 |
| GmFBX266.1                                                                                    | -----RLP <sup>68</sup> MELKLLILERLP--GVDLA-----KVACTCSELRYLSTSNELWKKK--                                                                                                                                                      | 42 |
| GmFBX493.1                                                                                    | -----TRL <sup>69</sup> P <sup>70</sup> MELKLLILERLP--GVDLA-----KVACTCSELRYLSTSNELWKKK--                                                                                                                                      | 43 |
| GmFBX107                                                                                      | -----ILQLSDEVLAHNILSR <sup>71</sup> LT--PRDVA-----SIGSV <sup>72</sup> CR <sup>73</sup> RI <sup>74</sup> RQLTKN--                                                                                                             | 38 |
| GmFBX167                                                                                      | -----SILQLSDEVLAHNILSR <sup>71</sup> LT--PRDVA-----SIGSV <sup>72</sup> CR <sup>73</sup> RV <sup>75</sup> RQLTKN--                                                                                                            | 39 |
| GmFBX291                                                                                      | -----SLKILAQLT--PRDIA-----SVSSV <sup>76</sup> CR <sup>77</sup> RLYELTKNEDLWRMVC--                                                                                                                                            | 37 |
| GmFBX391                                                                                      | -----SLKILARLT--PRDIA-----SVSSV <sup>76</sup> CR <sup>77</sup> RLYELTKNEDLWRMVC--                                                                                                                                            | 37 |
| GmFBX214.1                                                                                    | -----SLKILARLT--PRDIA-----SVGSV <sup>78</sup> CR <sup>79</sup> HLYELTKNEDLWRMVC--                                                                                                                                            | 37 |
| GmFBX351.1                                                                                    | -----SLKILARLT--PRDIA-----SVASV <sup>80</sup> CR <sup>81</sup> RLYELTENEDLWRMVC--                                                                                                                                            | 37 |
| GmFBX119.1                                                                                    | -----VLP <sup>82</sup> DEILCSILERLT--PRDAA-----RVSCVSSVMYILCNED <sup>83</sup> PLWMSLCL--                                                                                                                                     | 44 |
| GmFBX297                                                                                      | --SQ <sup>84</sup> RDRRTDAV <sup>85</sup> GDLRVLP <sup>86</sup> DEILCSILEGLT--PRDAA-----RVACVIGVMYILYNED <sup>87</sup> PLWMSLCRKG--                                                                                          | 60 |
| GmFBX37.1                                                                                     | -----MSVLDLPELVLECILEKLP--PPSLC-----QMAGV <sup>88</sup> CRSLRES <sup>89</sup> CVSDHLWER--                                                                                                                                    | 45 |
| GmFBX320                                                                                      | -----MSVLDLPELVLECILEKLP--PASLC-----QMAGV <sup>88</sup> CRSLRES <sup>89</sup> CVSDHLWER--                                                                                                                                    | 45 |
| GmFBX156                                                                                      | -----MSVLDLPELALDCILERLP--PSALC-----RMAAV <sup>90</sup> CRSLRERC <sup>91</sup> CVSDHLWERH--                                                                                                                                  | 46 |
| GmFBX487                                                                                      | -----MSVLDLPELALDCILERLP--PSSLC-----RIA <sup>92</sup> AV <sup>93</sup> CR <sup>94</sup> TLRERC <sup>95</sup> CVSDHLWEKH--                                                                                                    | 46 |
| GmFBX46                                                                                       | -----SLLDL <sup>96</sup> PDLPLECILEHLS--PAELC-----RVATV <sup>97</sup> CTSLRDRC <sup>98</sup> SDHLWKK--                                                                                                                       | 44 |
| GmFBX471.1                                                                                    | -----SLLDL <sup>96</sup> PDLPLECILEHLS--PAELC-----RVATV <sup>97</sup> CTSLRDRC <sup>98</sup> SDHLWKK--                                                                                                                       | 44 |
| GmFBX47.1                                                                                     | -----SLLDL <sup>96</sup> PEW <sup>99</sup> LDCILECLP--PQDLC-----RVAQV <sup>100</sup> CTSLRDRI <sup>101</sup> SDALWEKK--                                                                                                      | 45 |
| GmFBX48                                                                                       | -----MSLLNLPYPILDCILKLLS--PMDLT-----RMSEV <sup>102</sup> CTFLRDRC <sup>103</sup> SDPLWE--                                                                                                                                    | 44 |
| GmFBX49                                                                                       | -----MSLLNLP <sup>104</sup> EPILDCILKLLS--PMELV-----SMSEV <sup>105</sup> CTCLRDRC <sup>106</sup> SDPLW--                                                                                                                     | 43 |
| GmFBX472                                                                                      | -----GGNVSLFN <sup>107</sup> LQEPVLD <sup>108</sup> CILKLLS--PMGLI-----RMPEV <sup>109</sup> CTFFRDRC <sup>110</sup> GSD <sup>111</sup> PLWEV <sup>112</sup> HMKKK <sup>113</sup> GGVIGD--                                    | 60 |
| 1.....10.....20.....30.....40.....50.....60.....70.....80.....90.....100.....110.....120..... |                                                                                                                                                                                                                              |    |

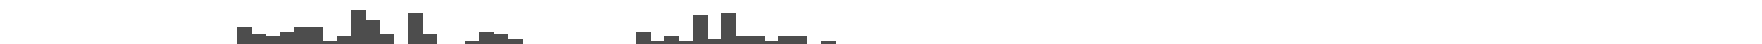



|                                                                                               |                                                                                                                                                                                     |     |
|-----------------------------------------------------------------------------------------------|-------------------------------------------------------------------------------------------------------------------------------------------------------------------------------------|-----|
| GmFBX244                                                                                      | -----SLLDLPEPTLDLILKCF--PNELC-----TVSEVCVSLKDKCQSDHFWEEH-----                                                                                                                       | 45  |
| GmFBX92.1                                                                                     | -----PHDALFFVLGYLG--VRDLI-----SVEGVCRSLCDAVRGDP LLWRIMH-----                                                                                                                        | 42  |
| GmFBX466                                                                                      | -----PHDALFFVLGYLG--VRDLI-----SVEGVCKSLCDAVRGDP LLWRIMH-----                                                                                                                        | 42  |
| GmFBX96                                                                                       | -----LGYLGL--LSDLI-----VVERVCKSLHSTVCGDPLLWRSIH-----                                                                                                                                | 34  |
| GmFBX173                                                                                      | -----LGYLGL--LSDLI-----VVERVCKSLHSTVRGDP LLWRSI-----                                                                                                                                | 33  |
| GmFBX106                                                                                      | -----PHEALFLVLSYLP--VYEVV-----VMSQVCTSLRDVNNDI-----                                                                                                                                 | 35  |
| GmFBX166                                                                                      | -----PHEAMFLVLAYLP--VYEVV-----VMSQVCTSLRDVNNDI-----                                                                                                                                 | 35  |
| GmFBX76.1                                                                                     | -----LLPSDILMHILRLLG--PKEAA-----KLSVVCKALRSLVSDNRLWIHF-----                                                                                                                         | 42  |
| GmFBX367                                                                                      | -----LPADILMQIVRLLG--PKHAA-----RLCLVSKSWRSLVSDNALWAH-----                                                                                                                           | 40  |
| GmFBX140                                                                                      | -----HSYSSCGSPISNMAQDYLF TILL LLLP--IDAIL-----SLSTCKRFRALTSSHTLWKS LCKRDLGSTCVDLSLSS--NNQHRHF P W M R L Y K Q-----                                                                  | 83  |
| GmFBX189                                                                                      | -----SSSGSAISNMAQDYLF TILL LLLP--IDAIL-----SLSMTCKRFRALSSHTLWRS LCKRDFGSTCVDLSLNSSSNNNQHHHFP W M R L Y K Q-----                                                                     | 83  |
| GmFBX236.1                                                                                    | -----KCLPDDTVIQLLSCLSY--YQDRA-----SLSSTCKTWRSLGSS LCLWSSLDL-----                                                                                                                    | 45  |
| GmFBX443.1                                                                                    | -----KCLPDDTVIQLLSCLSY--YRDR A-----SLSSTCKTWRSLGSLPCLWSSLDL-----                                                                                                                    | 45  |
| GmFBX103.1                                                                                    | -----EPCDLSFLLCLPDDVFGVLSRFL--PRDVC-----NLSLCKKSLYALGSSEKVWFTQCDMVG VVPQKDLVEWREG VSSYSKSLC-----                                                                                    | 77  |
| GmFBX163.1                                                                                    | -----LLCLPDDVFGMVSRFL--PRDVC-----NLSLCKKSLYALSSSEKVWFPQ-----                                                                                                                        | 44  |
| GmFBX126                                                                                      | -----LPDDVFAIVSRFMS--PRDVC-----NLCLCKKSLNALVASEKLWLTO-----                                                                                                                          | 41  |
| GmFBX159                                                                                      | -----SSLPEDVALKIASLLQ--VRDLC-----ALGCCSRFWRELCFSDCIWESL-----                                                                                                                        | 43  |
| GmFBX387                                                                                      | -----IISLLPEDVALKIASLLQ--VRDLC-----ALGCCSMFWKELCFSDCIW-----                                                                                                                         | 42  |
| GmFBX289                                                                                      | -----QSRSPATPATTITDLNEDCIAHGHL--LGDVC-----NMAMTSSALKRLAYSDFIWRQFFREHWHLELPWHSSNGGGGGGARGVYVMVR-----                                                                                 | 84  |
| GmFBX36                                                                                       | -----SITDLPPALISEILNCLD--PKDLG-----VVSCVSTIFQVASEHGAWKQ-----                                                                                                                        | 44  |
| GmFBX321                                                                                      | -----SITDLPPALISEILNCLD--PKDLG-----VVSCVSPILQVASEHHAWKQ-----                                                                                                                        | 44  |
| GmFBX235.1                                                                                    | -----NKVDFIQLLGPDMSIKILTHLDD--PCDLI-----RVSAVSSSWHRFVIEQGLCKQLCLKMFPEISGVAHIVELDNIIIEPLI-----                                                                                       | 75  |
| GmFBX376.1                                                                                    | -----NKVDFIQLLGPDMSIKILTHLDD--PCDLI-----RVSSVSSSWHRFVIEHGLCKQLCLKMFPEISGVAHIIELDNIIIE-----                                                                                          | 72  |
| GmFBX42.1                                                                                     | -----RPRLGDIPESCVALVLMYLD--PPDIC-----KLARLNRAFRDASSADFIWESKLP L N Y K F I V E K-----                                                                                                | 58  |
| GmFBX150                                                                                      | -----ATPSRRLGDIPESCVALVLMYLD--PPDIC-----KLARLNRAFRDASVADFIWESKLPSNYKFIVEK-----                                                                                                      | 62  |
| GmFBX234                                                                                      | -----SLSSETSLDDIPENCISMMMFN--PQEIC-----SLARVNKTFRASSANFVWESKLPPNYKFLNKNVLGE-----                                                                                                    | 66  |
| GmFBX375                                                                                      | -----STKTTLDDIPENCISMMMSFD--PQEIC-----TLARVNKAFRASSADFIWESKLPPSYKFLNKNVLG-----                                                                                                      | 63  |
| GmFBX265.1                                                                                    | -----SRDSRPGLGDIPESCISLFLMNL--PPDIC-----KLARVNRAFRASSADFIWESKLPPSYKFLANKV-----                                                                                                      | 63  |
| GmFBX495                                                                                      | -----SRDSRPGLGDFPESCISLFLMNL--PPDIC-----KLARVNRAFRASSADFIWESKLPPSYKFLANKV-----                                                                                                      | 63  |
| GmFBX87                                                                                       | -----SESASPSSSLGELPESCAVIMTYMD--PPQIC-----KLATLNRAFRGASSADFIWESKLPPNYDILLRRIFADFP SHLGKRG I Y A R L C R-----                                                                        | 84  |
| GmFBX396                                                                                      | -----PSESSPASSLGE L P E S C A V I M T Y M D--PPQIC-----KLATLNRAFRGASSADFIWESKLPPNYDILLRRIFADFP SHLGKRG I Y A R L C R-----                                                           | 84  |
| GmFBX241.1                                                                                    | -----GPGLGDIPESCVACVFLHLT--PPEIC-----NLARLNRAFRGAASSDSVWEAKLP R N Y Q D L L D L V P P P E-----                                                                                      | 63  |
| GmFBX295.1                                                                                    | -----GPGLGDIPESCVACVFLHLT--PPEIC-----NLARLNRAFRGAASSDSVWEAKLP R N Y Q D L L D L V P P P E H R S L S K-----                                                                          | 69  |
| GmFBX55                                                                                       | -----AAPGLGDIPENCVARVFLHLT--PPEIC-----NLARLNRAFRGAASADS V W Q T K L P R N Y Q D L L D L M P P E H R N L S K K D I-----                                                              | 73  |
| GmFBX492                                                                                      | -----LDQLPSALVATIMSKLD--IASIC-----SLASTSTFRSCARH-----                                                                                                                               | 37  |
| GmFBX61                                                                                       | -----FNIESLPHDCVSEILSHTS--PLEAC-----MVSLVSP T L R S C A N S D T V W R S-----                                                                                                        | 45  |
| GmFBX481                                                                                      | -----SCSFNIESLPHDCVSEILSHTS--PLVAC-----TVSLVSPSLCSCANS D T V W R S F L P S D Y E D I V S R A V N P F T L S F S S Y K Q L F Y S L-----                                               | 79  |
| GmFBX252                                                                                      | -----LPEDCVSKILSYTS--PPDAC-----RFSMVSTLRSADS D L L W R T F-----                                                                                                                     | 41  |
| GmFBX134                                                                                      | -----LPEECVATIISLTS--PKDAC-----QLSLVSPSFKEIADSDAVWAN-----                                                                                                                           | 40  |
| GmFBX135                                                                                      | -----VLPEECVATIISLTS--AKDAC-----QLSPVSPSLKAIADSDAVWANFLP S D C E D I I D Q S S T P T L N L L S K K Q I Y A Y L C D Y H V L F D N G N M L S L E K A T G K K C I M V-----             | 98  |
| GmFBX136                                                                                      | -----LPEECISMIVSFTS--PEDAC-----RLSLVSPFFKEIADSDAVWEN-----                                                                                                                           | 40  |
| GmFBX62.1                                                                                     | -----LPYDCFAHILSFTS--TQDVC-----RLSVSSIVQSMADSDAVWEK-----                                                                                                                            | 40  |
| GmFBX64                                                                                       | -----GGGEFEHLPEGCIANIVSFTT--PPDAC-----VLSLVSSSFRSASVTDFVWERFLP S D Y Q A I I S Q S S K P S T L T N Y S S K K D L Y L H L C H N P L L I D A G K K S F A L D K L N G K I C Y M L----- | 106 |
| GmFBX501                                                                                      | -----FNNLPEGCIANILSFTS--PRDVC-----RLSLLSSTFRSAAQSDAVWNK-----                                                                                                                        | 43  |
| GmFBX322                                                                                      | -----LQDLPEGCIAKILSYTT--PVDVC-----RLSLVSKAFRSAAESDTVW-----                                                                                                                          | 41  |
| GmFBX409                                                                                      | -----LQDLPEGCIAKILSYTT--PVDAC-----RLSVS--IAFRSAAESDTVWDCFLLSDFTSFIPP-----                                                                                                           | 54  |
| GmFBX503                                                                                      | -----TINLLPEGCISYILSYTT--PVDAC-----RLSLVSKAFRSAAQSDTLWDRF-----                                                                                                                      | 45  |
| GmFBX502.1                                                                                    | -----KFEDLAEGCMAKILSYTT--RADVC-----RLSLVSKAFHSA-----                                                                                                                                | 35  |
| GmFBX255.1                                                                                    | -----FQGLPEGCIASILSRTT--PADVC-----RFSVVSKI FR S A A E S D A V W K R-----                                                                                                            | 43  |
| GmFBX256                                                                                      | -----CMVNILSFTS--PRDVR-----RLSLVSSIFR--SDAVWDKFLP S D F H T M M E W Q M G P P F P S T I F S D K D L Y L Y L-----                                                                    | 64  |
| GmFBX254.1                                                                                    | -----DLPEGCVAHILSYICT--PEDIV-----RLSLVSKAFYSAADYDTVWD-----                                                                                                                          | 41  |
| GmFBX58                                                                                       | -----LSDDLVLVDILGFLD--ASSLG-----ILATVSKSFYVFTN-----                                                                                                                                 | 33  |
| GmFBX479                                                                                      | -----DELVLVDILGFLD--STSLG-----VLASVSKSFYVFTNHEPLWRNLV-----                                                                                                                          | 40  |
| GmFBX272.1                                                                                    | -----IHVILSKLG--AQDTA-----RVACVSKRFCSASDDTLWINHCFHELAL T Q P L D H L G N P L S S F K E C Y-----                                                                                     | 61  |
| GmFBX279                                                                                      | -----MGLESVGLAINVILKLG--AQDTA-----RVACVSKRFSSASDDTLWINLCFNELAL T Q P L D H L G N P L S S F K E C Y L-----                                                                           | 72  |
| 1.....10.....20.....30.....40.....50.....60.....70.....80.....90.....100.....110.....120..... |                                                                                                                                                                                     |     |

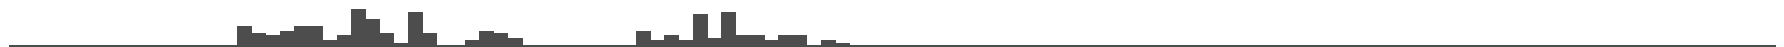

|                                                                                               |                                                                                                     |    |
|-----------------------------------------------------------------------------------------------|-----------------------------------------------------------------------------------------------------|----|
| GmFBX404                                                                                      | -----SFTDFPEDIQVCILSFLG--PPEIA-----TLACTSKRMG-----SLCATDSK-----                                     | 41 |
| GmFBX509                                                                                      | -----SFTDFPEDIQVSILSFLG--PSEIA-----TLACTSKKLG-----SLCSTVS-----                                      | 40 |
| GmFBX362                                                                                      | -----HSTFSWFEDIWTEIAKFLD--GKSLV-----MLAATSRWFRAIMDDGIWKFFVCLRDQLQVPPPECVAFRWCKL-----                | 67 |
| GmFBX9.1                                                                                      | -----LRLSDDCLAAIFHFLNT--ADRK-----RCSLVCLRWRVLVDGQRRHRL-----                                         | 41 |
| GmFBX268                                                                                      | -----LRLSDDCLAAIFHFLST--ADRK-----RCSLVCRRWRVLVDGQRRHRL-----                                         | 41 |
| GmFBX93                                                                                       | -----ADIPDECLAGIFQFLSS--VDRK-----TCSAVCRRWLR-----                                                   | 32 |
| GmFBX398                                                                                      | -----ADIPDECLAGIFQFLSS--VDRK-----TCSAVCRRWLR-----                                                   | 32 |
| GmFBX324                                                                                      | -----ISDLPNECLASVFQFLSS--ADRN-----RCSLVCRRWLQIE-----                                                | 35 |
| GmFBX406                                                                                      | -----ISDLPNECLASVFQFLSS--ADRG-----RCSLVCRRWL-----                                                   | 32 |
| GmFBX68                                                                                       | -----IDDIIPDNCLASIFQLFPP--VDHK-----NFSLVCRRC-----                                                   | 31 |
| GmFBX110                                                                                      | -----IDDIIPDNCLACIFQLFPP--ADQK-----KLSLVCRRWLKVEGHTTHRLC-----                                       | 43 |
| GmFBX363                                                                                      | -----YFPDEVIEHIFDYVVS--HSDR-----NALSILVCKSWYR-----                                                  | 32 |
| GmFBX469                                                                                      | -----YFPDEVIEHIFDYVVS--HSDR-----NALSILVCKSWYR-----                                                  | 32 |
| GmFBX18                                                                                       | -----PDEVIEHIFDYVTS--QRDR-----NDLSLVCKNWHR-----                                                     | 30 |
| GmFBX30.1                                                                                     | -----PEEVLEHVFSFIEC--DKDR-----GSISLVCKSWYE-----                                                     | 30 |
| GmFBX238.1                                                                                    | -----PEEVLEHVFSFIEC--DKDR-----GSISLVCKSWYE-----                                                     | 30 |
| GmFBX59                                                                                       | -----PEEVLEHVFSFIWS--ERDR-----NAISLVCKSWYE-----                                                     | 30 |
| GmFBX480                                                                                      | -----PEEVLEHVFSFIWN--ERDR-----NAISLVCKSWYE-----                                                     | 30 |
| GmFBX34                                                                                       | -----FPDQVLENVLENVLHFLPS--RRDR-----NAASLVCRSWYR-----                                                | 35 |
| GmFBX333                                                                                      | -----FPDQVLENVLENVLHFLSS--RRDR-----NAASLVCRSWYR-----                                                | 35 |
| GmFBX74                                                                                       | -----RTLSPLPDQVLENVLESVLHFLTS--RRDR-----NAASLVCKSWYR-----                                           | 40 |
| GmFBX117                                                                                      | -----SLSPLPDQVLENVLESVLHFLTS--RRDR-----NAASLVCKSWYR-----                                            | 39 |
| GmFBX142                                                                                      | -----KDLPEECWELVFRFI--GRHL-----ESLSLVCKQFLSIINRLQFS-----                                            | 41 |
| GmFBX73                                                                                       | -----SIESLPDECLFEILRRLPA--GQDR-----SVCASVSKRWMLMLSSICKN-----                                        | 43 |
| GmFBX115                                                                                      | -----SIESLPDECLFEILRRLPA--GQDR-----SVCASVSKRWMLMLSSI-----                                           | 40 |
| GmFBX329                                                                                      | -----SIEALPDECLFEIFRRLPA--GEDR-----SACACVSKRWMLMLSSI-----                                           | 40 |
| GmFBX401                                                                                      | -----EALPDECLFEIFRRLPS--GEDR-----SACACVSKRWLM-----                                                  | 33 |
| GmFBX298                                                                                      | -----EVLPEDECLFEIFRRLPS--GKER-----SSCACVSKRW-----                                                   | 31 |
| GmFBX393.1                                                                                    | -----EVLPEDECLFEIFRRLPS--GKER-----SSCACVSKRW-----                                                   | 31 |
| GmFBX78                                                                                       | -----DVLPEDECLFEVFRWLSS--GKER-----SSCAYVSKRW-----                                                   | 31 |
| GmFBX161                                                                                      | -----PDDLIVEIFSRlhs--MSTR-----DACSLVCRRWFR-----                                                     | 30 |
| GmFBX384                                                                                      | -----PDELIVEIFSRlhs--KSTR-----DACSLVCRRWFR-----                                                     | 30 |
| GmFBX301.1                                                                                    | -----LPDELLIEIFRRLDS--KSNR-----DAGSLVCTRWLR-----                                                    | 31 |
| GmFBX346                                                                                      | -----IPDELLIEIFRRLDS--KSSR-----DAGSLVCTRWLR-----                                                    | 31 |
| GmFBX145                                                                                      | -----NDCTSIMHLPDDCLVIIIFHGLDS--RIDR-----DSFGLTCRRWLH-----                                           | 39 |
| GmFBX273                                                                                      | -----LMHIFNFLPP--IPDR-----FNTALVCHRWNYLACHPRLWLRV-----                                              | 37 |
| GmFBX334.1                                                                                    | -----MDNIPEHIVWEILSRlKK--TSDR-----NSVSLVCKRLYYLDNAQRTFVRVGC-----                                    | 47 |
| GmFBX366                                                                                      | -----DELLQEIFQKLPS--SSS-----SSVSLVCKRWLR-----                                                       | 29 |
| GmFBX465                                                                                      | -----DELLQEILQKLPS--SSS-----SSVSLVCKRWLR-----                                                       | 29 |
| GmFBX137                                                                                      | -----DELLLRILSKLPD--SSQQ-----RNSNSLVCKRWLN-----                                                     | 30 |
| GmFBX470.1                                                                                    | -----CWLLLPDELWRRILEIGIE--SNGFSY--KDLCCVSI--SCRRHLRLS--SEEPLWNRLLFSDYFQSQSHPPSSSSSSSSSSKSLYRLR----- | 79 |
| GmFBX158                                                                                      | -----GSNKKHGSVSVTTIKSLPKELQVEIFAKVAT--RSI-----FDHCMIKLCCKEFLHAAEDDYVRHASMENFALVPLPW-----            | 73 |
| GmFBX388                                                                                      | -----KKHGSVSVTAIKFLPKELQVEIFAKVAT--RSV-----FDHCMIKLCCKEFLRAAEDNYVRHASMENFALVPLPW-----               | 69 |
| GmFBX35                                                                                       | -----DDKPPILSLPSDLLEEIIAKAAS--KSS-----IDLVNIKLSCKDFLHASEANNVWKNVSLEDFFSGWYPH-----                   | 64 |
| GmFBX80                                                                                       | -----KKHDLFECLPDDLVLVILSKLSS--TASSP-----SDFINIILTCKRLNRLGLHRLVLSKAASKLFAT-----                      | 61 |
| GmFBX128                                                                                      | -----SKNKHDLFECLPDDLVLVILSKLSS--TASSP-----SDFINIILTCKRLNRLGLHRLV-----                               | 53 |
| GmFBX97                                                                                       | -----KTFEKTAGADYEFFESLPDDLVISIFCKLSS--TATKP-----SDFVNILITCKRLNRLALHSLVLSKASPRTFTI-----              | 69 |
| GmFBX175                                                                                      | -----EKLAAGRYDFFESLPDDLVISIFCKLSS--TATKP-----SDFVNVLITCKRLNRLALHSLVLSKASPRTFTI-----                 | 66 |
| GmFBX304.1                                                                                    | -----DRLPDLSLLLVFNKIG-----DVKALGRCCVVSRRFHS-----                                                    | 34 |
| GmFBX343.1                                                                                    | -----DRLPDLSLLLVFNKIG-----DVKALGRCCVVSRRFHS-----                                                    | 34 |
| GmFBX8                                                                                        | -----IDRLPIDLLAHIFVLFTS--FTDLA-----QASGVCK-----KWKQGVKESLAR-----                                    | 42 |
| GmFBX269.1                                                                                    | -----IDRLPIDLLAHIFVLFTS--FTDLA-----QASGVCK-----KWKQGVKESLAR-----                                    | 42 |
| GmFBX44                                                                                       | -----IDRLPIDLLAYIFVLFTS--FTDLA-----QASGVCK-----KWKQGVKESLAR-----                                    | 42 |
| GmFBX102.1                                                                                    | -----DSMPDAILQCILSRITN--ARDVS-----SCNCVSK-----RWKDS-----                                            | 34 |
| GmFBX178                                                                                      | -----DSLPAAILQCILSRITN--ARDVS-----SCNCVSK-----RWKDS-----                                            | 34 |
| 1.....10.....20.....30.....40.....50.....60.....70.....80.....90.....100.....110.....120..... |                                                                                                     |    |



|                                                                                               |                                                                                            |    |
|-----------------------------------------------------------------------------------------------|--------------------------------------------------------------------------------------------|----|
| GmFBX182                                                                                      | -----LPDAILQYILSHINN-ARDVA-----ACNCVSK-----RWKD-----                                       | 31 |
| GmFBX337                                                                                      | -----LPDAILQYILSRINN-ARDVA-----ACNCVSK-----RWKD-----                                       | 31 |
| GmFBX165                                                                                      | -----IAMGTMEDLPASVLAELSRFTD-TTDVA-----RCRVVSKSLNAASYEVRLNLV-----                           | 50 |
| GmFBX276.1                                                                                    | -----DQLPVEVIGNILSHLRA-ARDVV-----IASATCR-----KWRQACCK-----                                 | 37 |
| GmFBX281                                                                                      | -----DQLPVEVIGNILSHLRA-ARDVV-----IASASCR-----KWRLACCK-----                                 | 37 |
| GmFBX477                                                                                      | -----EHLPEVEIGNILSLLGS-ARDVV-----VASVTCK-----KWREA-----                                    | 34 |
| GmFBX264.1                                                                                    | -----DILVKIFQLLDI-FELTS-----GISRVCS-----AWRLACCDPLLWKILD-----                              | 40 |
| GmFBX496.1                                                                                    | -----DILVKIFQLLDI-FELTS-----GISRVCS-----AWRMACCDPLLWKILD-----                              | 40 |
| GmFBX305                                                                                      | -----WLDLPRDVLCITIFQKLGA-TEILT-----RAQGVCS-----VWRAISKEPLLWRTID-----                       | 46 |
| GmFBX341                                                                                      | -----WLDLPRDVVCTIFQKLGA-TEILT-----RAQRVCS-----VWRGISKEPLLWRTID-----                        | 46 |
| GmFBX192.1                                                                                    | -----SASCQCTKGHLSEDVIFLVFHNLNWNPKLIA-----TLSCVCKWFDDLAKRVLWKEFCRTRAPKMLCDLQ-----           | 65 |
| GmFBX444.1                                                                                    | -----SASCQCTKGHLSEDVIFLVFHNLNWNPKLIA-----TLSCVCKWFDDLAKRVLWKEFCRTRAPKMLCDLQ-----           | 65 |
| GmFBX288.1                                                                                    | -----SASCQCTKGHLSEDVIFLVFQHLNWNPKLIA-----ALSCVCKWFDDLSKQVLWKEFCRTRAPKMLDLQSSGSHSVDCGN----- | 75 |
| GmFBX454                                                                                      | -----GHVSEDVIFLVFQHLNWNPKLIA-----ALSCVCKWFDDLSKQVLWKEFCRTRAPKMLDLQSSGSHSVDCGN-----         | 67 |
| GmFBX3.1                                                                                      | -----MGPDILISDLPQSIIESILVQLP-IRDA-----VRTS-ILSSKWRYKWASITRLVFDDKCVPF-----                  | 55 |
| GmFBX25                                                                                       | -----MGPDILISDLPQSIIESILVQLP-IRDA-----VRTS-ILSSKWRYKWASITQLVFDDKCVPF-----                  | 56 |
| GmFBX23                                                                                       | -----RISDLP SHLIDFILQRLP-LQDV-----VRTS-LLSSKWRYKWTSI-----                                  | 39 |
| GmFBX24                                                                                       | -----RISDLP SHLIDFILQRLQ-LQDV-----VRTS-LLSSKWRYKWTS-----                                   | 38 |
| GmFBX407                                                                                      | -----RISCLPGHVIDQVLSHLS-IREA-----VRTS-VLSSKWR-----                                         | 33 |
| GmFBX336.1                                                                                    | -----SVDRISQFPDHHVIHHLSHLRN-VNDA-----IRTS-VLSKRWRLEWYSYSVL-----                            | 46 |
| GmFBX184.1                                                                                    | -----IENLPIVLHDILSRLP-EKDA-----ARTS-VLSKKWAEIWS-----                                       | 36 |
| GmFBX185.1                                                                                    | -----ISTLPKTIHLHDILSRMP-EEDA-----VRTS-VLSKSWAET-----                                       | 34 |
| GmFBX280                                                                                      | -----NRDIISTMPDILGDILSRLT-LKEA-----ARTS-VLATKWRYHWTFFSGLLDFDHSLRNF-----                    | 55 |
| GmFBX395                                                                                      | -----GDLINKLPDGI PVAILSKLP-INEA-----ARTS-ILSRKWRYLW-----                                   | 38 |
| GmFBX248                                                                                      | -----RLSELPDFVLLHIMNFID-TKDA-----LRTC-ILSKRWKDLWK-----                                     | 37 |
| GmFBX250                                                                                      | -----RLSELPDFVLLHIMNFID-TKDA-----LRTC-ILSKRWKDLWK-----                                     | 37 |
| GmFBX249                                                                                      | -----ERDRLSELPDFVLLHIMNFII-TKDA-----LRTC-ILSKRWKDLWKHLTLTSFYQS-----                        | 50 |
| GmFBX373                                                                                      | -----RISELPDNVLLHIMNFVD-TKDA-----VKTC-VLSKRWKDLGKG-----                                    | 38 |
| GmFBX17                                                                                       | -----RISELPDCILMHIMSFID-TKDA-----VQTC-ILSKRWKDLK-----                                      | 36 |
| GmFBX220                                                                                      | -----NISEFPDHLVLLHIMSLMD-TKSA-----VRTC-VLSKRWKDLCKRL-----                                  | 39 |
| GmFBX219                                                                                      | -----RISELPDSILLHILNFMN-TESA-----VQTC-VLSKRWKDLCKR-----                                    | 38 |
| GmFBX224                                                                                      | -----RISELPISVLLHILEFMN-TKDA-----VQTC-VLSKPWKDLCKR-----                                    | 38 |
| GmFBX225                                                                                      | -----RISELPDSVLLHIIEFMD-TKSG-----VQTC-VLSKRWKDLWKS-----                                    | 38 |
| GmFBX306.1                                                                                    | -----RPDRISALPDSLLFHMNFMD-TKSA-----VQTC-VLSKRWNDSLKCLTNLTFNS-----                          | 49 |
| GmFBX233.1                                                                                    | -----RLSDLPDFVLLHIMKFMS-MKHA-----VQTC-VLSKRWKELWKR-----                                    | 38 |
| GmFBX374                                                                                      | -----RLSDLPDLVLLHIMKFMS-MKHA-----VQTC-VLSTRWKELWKRL-----                                   | 39 |
| GmFBX105                                                                                      | -----LSDLPECILLHIMKFMN-TRHA-----VQTC-VLSKRWKDLWKR-----                                     | 37 |
| GmFBX226.1                                                                                    | -----RLSELPDCVVLHIMEFMD-TKYA-----VQTC-VLSKRWKDLWKR-----                                    | 38 |
| GmFBX227.1                                                                                    | -----RLSELPDCVVLHIMEFMD-TKYA-----VQTC-VLSKRWKDLWKR-----                                    | 38 |
| GmFBX228.1                                                                                    | -----RLSELPDCVVLHIMEFMD-TKYA-----VQTC-VLSKRWKDLWKR-----                                    | 38 |
| GmFBX229.1                                                                                    | -----RLSELPDCVVLHIMEFMD-TKYA-----VQTC-VLSKRWKDLWKR-----                                    | 38 |
| GmFBX230.1                                                                                    | -----RLSELPDCVVLHIMEFMD-TKYA-----VQTC-VLSKRWKDLWKR-----                                    | 38 |
| GmFBX231.1                                                                                    | -----RLSELPDCVVLHIMEFMD-TKYA-----VQTC-VLSKRWKDLWKR-----                                    | 38 |
| GmFBX232                                                                                      | -----RLSELPDCVVLHIMEFMD-TKYA-----VQTC-VLSKRWKDLWKR-----                                    | 38 |
| GmFBX247                                                                                      | -----RLSELPDCILLYIMKFMN-TKYA-----VQTC-ILSKRWKNLWKR-----                                    | 38 |
| GmFBX485                                                                                      | -----RLSELPDSVLVHIMELME-TRNA-----VQTC-VLSQRWKNLWRR-----                                    | 38 |
| GmFBX221                                                                                      | -----KISEMPDNILLHMMNFMD-TREA-----VQTC-VLSKRWNWLWKR-----                                    | 38 |
| GmFBX222                                                                                      | -----KISELPDNILLHMMNFMD-TREA-----VQTC-VLSKRWNWLWKR-----                                    | 38 |
| GmFBX223                                                                                      | -----KISELPDNILLHMMDFMD-TREA-----VQTC-VLSKRWNWLWKR-----                                    | 39 |
| GmFBX251.1                                                                                    | -----KLPENVLLHIMNFME-TRHA-----VQTC-VLSKRWNWLWKS-----                                       | 35 |
| GmFBX218                                                                                      | -----RISELPDTVLLHILNFMN-TKDA-----VKTS-VLFNRWKNFCKAL-----                                   | 39 |
| GmFBX118.1                                                                                    | -----RLSDLPCEVLLHILTFILN-AKHA-----VRTC-VLSTRWKDLWKR-----                                   | 38 |
| GmFBX355                                                                                      | -----RISELPITHVFLRILEFMN-TRDA-----VRLC-ALSKSWKDFWKR-----                                   | 38 |
| GmFBX40                                                                                       | -----RLSNLPDEVLHRLSSLD-AKSA-----VQTC-VLSKRWTHVWTS-----                                     | 38 |
| GmFBX138                                                                                      | -----VSNLPDEVLHRLSLD-AKSA-----VQTC-VLSKRWRHVWTS-----                                       | 37 |
| 1.....10.....20.....30.....40.....50.....60.....70.....80.....90.....100.....110.....120..... |                                                                                            |    |

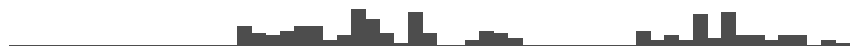



|                                                                                               |                                                                                                          |    |
|-----------------------------------------------------------------------------------------------|----------------------------------------------------------------------------------------------------------|----|
| GmFBX392                                                                                      | -----QEQQEEDRLSNLPDDIIDRVLYFLD--AVSA-----VQTS--VLSKRFIYLWTSLPVLKFDPLLHFSFVDH-----                        | 64 |
| GmFBX139.1                                                                                    | -----RLSDMPDCLIIHHILSFME--TKDA-----IQTC--VLSKRWRYLWA-----                                                | 37 |
| GmFBX183                                                                                      | -----RLSDMPDCIIHHILSFME--TKDA-----IQTC--VLSKRWRYLWASV-----                                               | 39 |
| GmFBX257                                                                                      | -----RLSGLPDEILFIIMSFTM--IKDA-----VKTC--ILSKRWRNLWKFL-----                                               | 39 |
| GmFBX500                                                                                      | -----RLSGLPDEILLIIMSFTM--IKDA-----VQTC--ILSKRWRNLWKFL-----                                               | 39 |
| GmFBX310                                                                                      | -----KDIISQIHDSILGHILSFLP--TMEA-----VQTS--VLSTRWIDVWTSITN-----                                           | 43 |
| GmFBX359                                                                                      | -----ISQIHDSILGHILSFLP--TMEA-----VQTS--VLSTRWINVWTS-----                                                 | 37 |
| GmFBX360                                                                                      | -----EDIISKLHESILGHILSFLP--TMES-----VHTS--VLSKRWDAAKSITGLQFNDTLLCF-----                                  | 53 |
| GmFBX361                                                                                      | RLPPEQTVVEGGIISKLHESILGKILSFLP--TTDA-----VHTS--VLSKGVHIVWKS-----                                         | 51 |
| GmFBX317                                                                                      | -----SFSSLTESVLCYILSFLP--TKDA-----VATS--VLSKRWKPLWRS-----                                                | 38 |
| GmFBX400                                                                                      | -----TLSKLPEPLVSHILSFLP--TKDA-----VRTS--VLSKKW-----                                                      | 32 |
| GmFBX311                                                                                      | -----IFSDLPDVIIIGRILSILP--TKEA-----VRTS--ILSKRWRNLWK-----                                                | 37 |
| GmFBX399                                                                                      | -----FISNLPDFIIGLILSLLP--TKDA-----FRTS--VLSKRWINL-----                                                   | 35 |
| GmFBX356                                                                                      | -----KKSCKSNHEGPNKISYLSDVIIIGRILFFLP--NKDT-----VRTS--ILSKR-----                                          | 43 |
| GmFBX358                                                                                      | -----KKSCKSNHEGPNNISYLPVVIIGRILFFLP--NKVA-----VRTS--VLSKR-----                                           | 43 |
| GmFBX357                                                                                      | -----PNKISYIPDVIIIGRILFFLP--NKDA-----VRTS--VLSKS-----                                                    | 33 |
| GmFBX494                                                                                      | -----IGNLPNEIIQHILSLLP--TKDA-----VKTS--VLSRRWHSQ-----                                                    | 34 |
| GmFBX149                                                                                      | -----RISELPDDVVYHILSFLT--IKEA-----IATS--LLSTRWRFLWTML-----                                               | 39 |
| GmFBX204                                                                                      | -----KISALPDEVLGHILSFLS--TQEA-----ISTE--LVSKRWQPLWL-----                                                 | 37 |
| GmFBX313                                                                                      | -----RISSLPDEIICHILSFLP--TIEA-----VTTS--VLSTRWRSI-----                                                   | 35 |
| GmFBX432                                                                                      | -----RISSLPDTLLCHILSFLP--TIES-----VATS--VLSKRWRPLWRSV-----                                               | 39 |
| GmFBX206                                                                                      | -----RISSLPDTLLCHILSFLP--TKEA-----IATTSLLSKRW-----                                                       | 33 |
| GmFBX207                                                                                      | -----RISNLPDAVLCHILSFLP--TKQS-----IVTS--ILSKRWKALWRSV-----                                               | 39 |
| GmFBX431                                                                                      | -----RISNLPDVVLSHILSILP--TNVA-----VATS--VLSKRWKLLWRS-----                                                | 38 |
| GmFBX433                                                                                      | -----RISSLPNELLCHILSFLP--TKQA-----VATG--ILSKRWGPLW-----                                                  | 36 |
| GmFBX434                                                                                      | -----RISHLPDVLLQILSLLP--TKQA-----VITG--ILSKRW-----                                                       | 32 |
| GmFBX282                                                                                      | -----RISDLPDAVLHQILFLLP--IKCV-----AQMS--ILSKRWKFLW-----                                                  | 36 |
| GmFBX180                                                                                      | -----GKDLISALPDPLVGAIISLLP--NTEG-----VRTC--VFSKRWKAWMHMSHLNIDQVQMMKPFIOANLCGVHHKRCVDVPFQHQ-----          | 77 |
| GmFBX314                                                                                      | -----KDLISTLPDSVLVSIIISLLP--CNEG-----VRTC--VLSNRWKTMMKHVPHLSLDQSK-----                                   | 50 |
| GmFBX309                                                                                      | -----ISNLPDEIKTNILSKLC--IDEA-----VRCS--VLSKTWKGLWKG-----                                                 | 37 |
| GmFBX203.1                                                                                    | -----TDKLSSLPPELLCLFIIISLLP--FKDA-----VRTC--ILSKYWLHIWKNSPK-----                                         | 43 |
| GmFBX216.1                                                                                    | -----KLSSLPPELLCLFIIISLLP--FKDA-----VRTS--ILSKHWLHIW-----                                                | 36 |
| GmFBX259                                                                                      | -----SLLPEIVLITIVSFLP--FKEA-----VRTS--ILSKRWSKIW-----                                                    | 34 |
| GmFBX38                                                                                       | -----CFCLLPPIEVVLTILSLLP--FKEV-----VRTC--VLSKDWDLDICK-----                                               | 37 |
| GmFBX39                                                                                       | -----SDRISSLPQLLMTIVSLLP--FKES-----MRAS--IISSKWLKACKLTKNIKEILRRDLVEFIHFWID-----                          | 61 |
| GmFBX22                                                                                       | -----LFSNLPDEILGRIVSFLP--NESS-----LETS--LLSTRWRDLW-----                                                  | 36 |
| GmFBX452.1                                                                                    | -----LFSNLPDQILCRIVSFLP--NESS-----LETS--LLSTRWRDLW-----                                                  | 36 |
| GmFBX491                                                                                      | -----LFSNLPDEVLS CIVSFLP--NESA-----LETS--LISTRWDLW-----                                                  | 36 |
| GmFBX267.1                                                                                    | -----DFFSNLPDEILS CIVSFLP--LETS-----LETS--LISTRWDLW-----                                                 | 33 |
| GmFBX143                                                                                      | -----IWSNLPFDILANIFSFLS--PDS-----LARARSVCNWHTC-----                                                      | 36 |
| GmFBX187                                                                                      | -----WSNLPDLILANIFSFLS--PDS-----LARA-----                                                                | 24 |
| GmFBX60                                                                                       | -----IEKKKNLFSELTDDIVLNIFYKLED--DPRH-----WARLACVCTKFSSLVDRDFCWKTKCSLTIPQDILLSAAASDPFLSLHKLSFCCPGLRH----- | 85 |
| GmFBX7.1                                                                                      | -----WANLPPELLLDIIIRVED--SETTPARAVVVYCGSVCKSWRAVTKEIVKTPEQ-----                                          | 52 |
| GmFBX270.1                                                                                    | -----HWANLPPELLLDIIIRVED--SETTPARAVVVYCGSVCKSWRAVTKEIVKTPEQ-----                                         | 53 |
| GmFBX15.1                                                                                     | -----WANLPPELLLDIIQVVEE--SETTPARAVVVFCASVCKSWRSITREIVKTPEQ-----                                          | 52 |
| GmFBX369                                                                                      | -----WANLPPELLLDIIQRIE--SETTPARAVVVFCASVCKSWRSITREIVKTPEQ-----                                           | 52 |
| GmFBX323.1                                                                                    | -----RWANLPPELLLDIIQRLA--SETTPARRALVACASVCLWREITKDVIKTP-----                                             | 51 |
| GmFBX408.1                                                                                    | -----RWANLPPELLLDIIQRLA--SETTPARRALVACASVCKLWREITKDVIKTP-----                                            | 53 |
| GmFBX20.1                                                                                     | -----RWASLPPELLCDVIKRLA--SETTPARKHVACAAVCKSWREMCKEIVTSPEF-----                                           | 53 |
| GmFBX372.1                                                                                    | -----RWASLPPELLRDVIKRLA--SETTPARKHVACAAVCKSWREMCKEIVTSPEF-----                                           | 53 |
| GmFBX151                                                                                      | -----WASLLELLRDVINRLEA--SETTPGCKHVACAAVCKSWREMCKEIVTSPEF-----                                            | 52 |
| GmFBX283                                                                                      | -----RWASLPPELLGDVINRLEA--SETTPGRKHVVACVAMCKSWREMCKEIVTSPEF-----                                         | 53 |
| GmFBX262.1                                                                                    | -----RWASLPPELLRDVINRLEA--SETTPGCKHVACAAVCKSWREMCKEIVTSPEF-----                                          | 53 |
| GmFBX498.1                                                                                    | -----RWASLPPELLRDVINRLEA--SETTPGCKHVACAAVCKSWREMCKEIVTSPEF-----                                          | 53 |
| GmFBX181                                                                                      | -----RWASLPPELLFDIIRLEE--SENTTPARKHVACAAVCKSWRMCKDIVKSPEF-----                                           | 53 |
| 1.....10.....20.....30.....40.....50.....60.....70.....80.....90.....100.....110.....120..... |                                                                                                          |    |

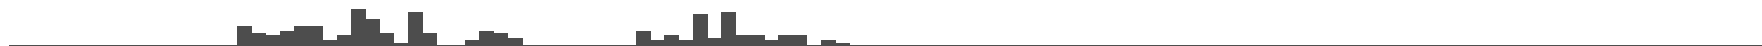

|            |                                                                                               |    |
|------------|-----------------------------------------------------------------------------------------------|----|
| GmFBX338   | -----RWASLPPELLFDIIRRLIEE-SENTPARKHVVACAAVCSWRNMCKDIVKSPEF-----                               | 53 |
| GmFBX302   | -----CWANMPQELLREVLLRIEA-SEDTPPRKSVVSCAGVCRSWRHITKDIVKTP-----                                 | 51 |
| GmFBX345   | -----CWANMPQELLREVLFRIEA-SEDAWPPRKSVVACAGVCRSWRQITIDIVKT-----                                 | 50 |
| GmFBX29    | -----CWANMPPELLRDVLMRIEA-SEDSWPAQKHVVACAGVCRSWREIMKEI-----                                    | 47 |
| GmFBX160.1 | -----NMPRELLREVLLRIES-SEATWPSRRSVVACGGVCRTWRLIVKEIV-----                                      | 45 |
| GmFBX386.1 | -----WWANMPHELLREVLLRIES-SESTWPLRRSVVACGGVCRTWRRL-----                                        | 43 |
| GmFBX286   | -----WSSMLPEILGEIVRRVDA-AEEQWPNRQNVVACACVCKRWRDITREVV-----                                    | 47 |
| GmFBX312   | -----WSNMLPEILGEIVRRVDA-AEEQWPNRQNVVACACVCKRWRDITREVV-----                                    | 47 |
| GmFBX33.1  | -----DWSELTRECLINILSRLSV-EDR-----WRGTMLVCKSWFSVFKEPSLH-----                                   | 43 |
| GmFBX67    | -----WGELPPELLESTISKTLTI-YVD-----YLRFRSVCRSWRSSVVKIPLH-----                                   | 42 |
| GmFBX307   | -----DWSNLPRLDLSQIVSGLGL-ID-----FLSFRGVCEDWRVA-----                                           | 35 |
| GmFBX340   | -----WSNLPHDLLSRISSGLGL-ID-----FLSFRGVCKDWRVVS-----                                           | 35 |
| GmFBX217.1 | -----DWSSLPRGILEMVAERLTF-ID-----CLSIKSVCTSWNRV-----                                           | 35 |
| GmFBX190   | -----EGIGKVPEDVVIIEILVRGG--IREWE-----QISCVKKQWASLFRCDCECFWQAALSFYYPHQLPLPPPTWPFVPLFNNSKR----- | 75 |
|            | 1.....10.....20.....30.....40.....50.....60.....70.....80.....90.....100.....110.....120..... |    |

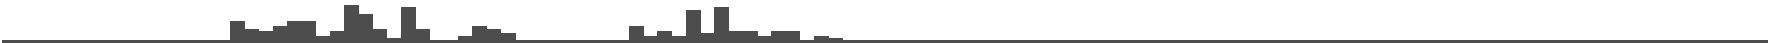

Supplement: s1 [file s1]
