# Supplementary figures and images for: Genome-Wide Analyses of the Soybean F-Box Gene Family in Response to Salt Stress
Source: MDPI journal article supplement (doi:10.3390/ijms18040818), 2017-04-12

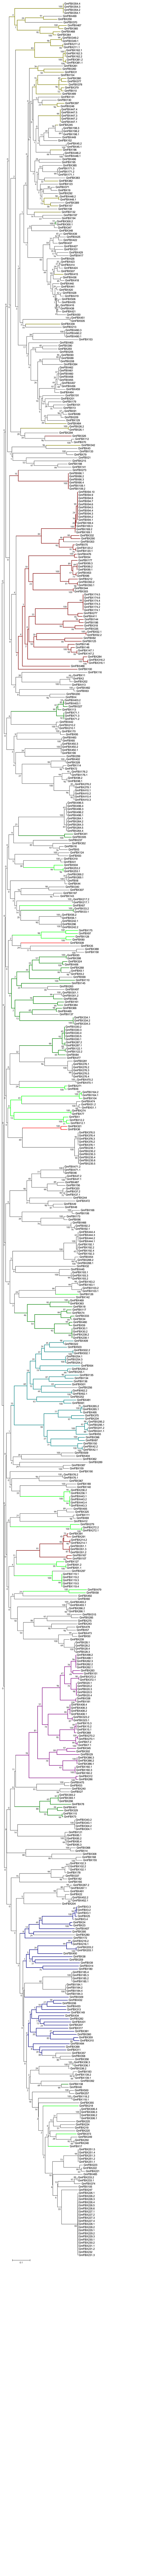

Supplement: s1 [file s1]

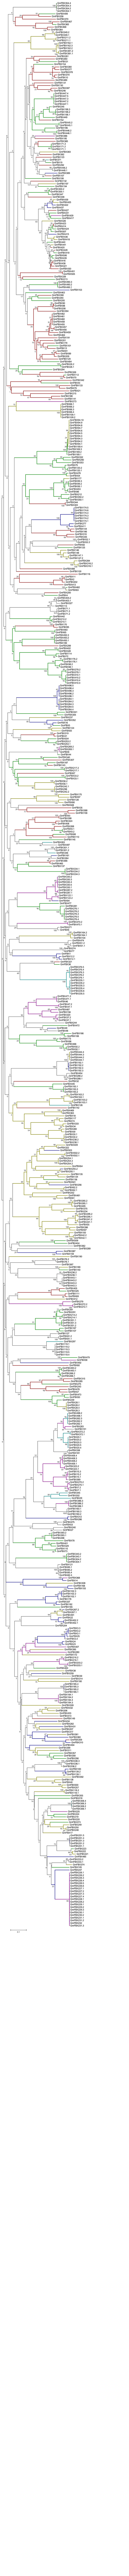

Supplement: s1 [file s1]

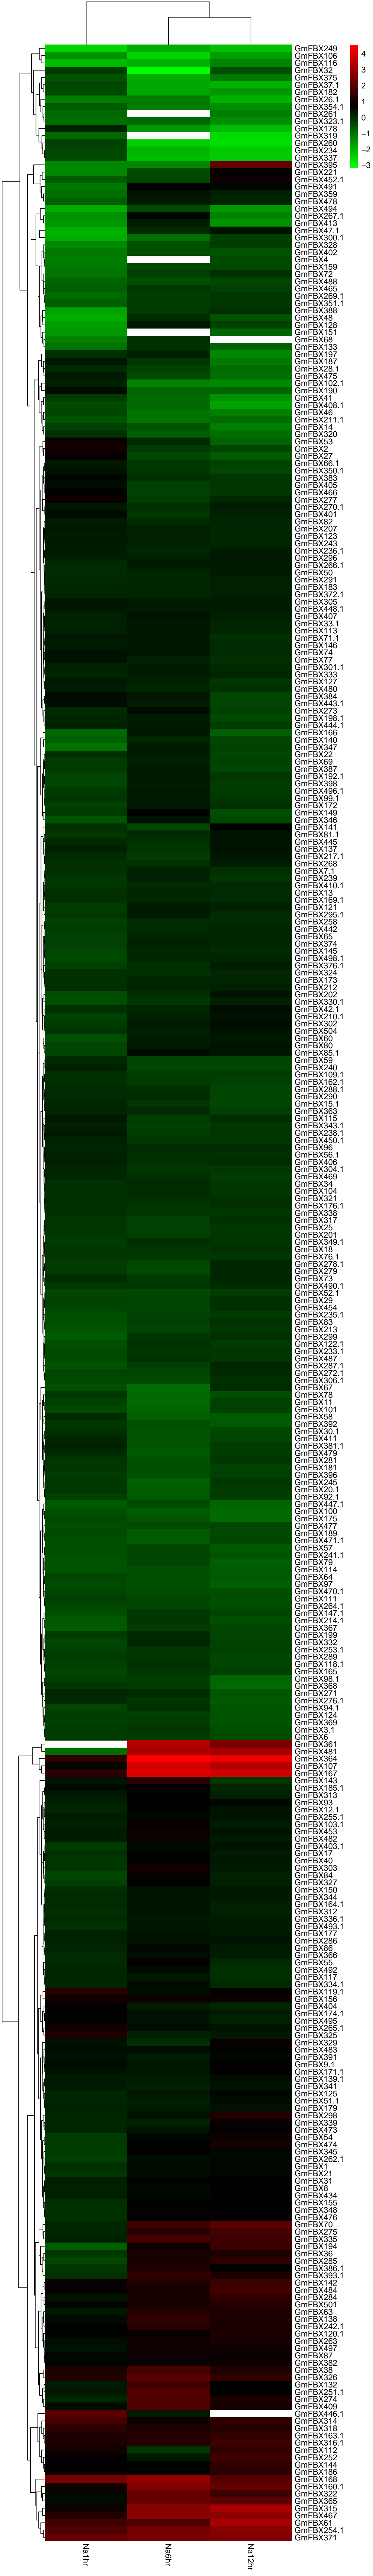

Supplement: s1 [file s1]
